# Supplementary material
Source: publisher site journal article supplement (https://www.spandidos-publications.com/6599/downloadSupplementary)
Supplement: Supplementary file 1 [file downloadSupplementary]

Table SI. Univariate Cox regression analyses of the total cohort, patients following primary surgery and patients with negative HER2 expression.

| Characteristic        | Borders         | Total cohort |             |         | Primary surgery |             |         | Negative HER2 expression |             |         |
|-----------------------|-----------------|--------------|-------------|---------|-----------------|-------------|---------|--------------------------|-------------|---------|
|                       |                 | Hazard ratio | 95% CI      | P-value | Hazard ratio    | 95% CI      | P-value | Hazard ratio             | 95% CI      | P-value |
| Age, years            | ≥65 vs. <65     | 1.197        | 0.974-1.472 | 0.088   | 2.373           | 1.529-3.681 | <0.001  | 1.231                    | 0.968-1.567 | 0.091   |
| Sex                   | female vs. male | 0.812        | 0.586-1.124 | 0.209   | 0.760           | 0.404-1.430 | 0.396   | 0.789                    | 0.545-1.141 | 0.208   |
| (y)pT                 | ≥2 vs. 1        | 1.577        | 1.375-1.810 | <0.001  | 2.195           | 1.731-2.784 | <0.001  | 1.553                    | 1.330-1.815 | <0.001  |
| (y)pN                 | ≥1 vs. 0        | 1.687        | 1.539-1.849 | <0.001  | 2.046           | 1.709-2.448 | <0.001  | 1.762                    | 1.582-1.962 | <0.001  |
| L, stage              | 1 vs. 0         | 1.091        | 0.957-1.242 | 0.192   | 1.109           | 0.881-1.396 | 0.380   | 1.394                    | 1.094-1.777 | 0.007   |
| V, stage              | ≥1 vs. 0        | 0.888        | 0.774-1.020 | 0.093   | 0.811           | 0.639-1.029 | 0.085   | 0.893                    | 0.761-1.048 | 0.165   |
| Pn, stage             | 1 vs. 0         | 0.983        | 0.863-1.120 | 0.800   | 0.866           | 0.686-1.093 | 0.227   | 0.954                    | 0.819-1.112 | 0.546   |
| G, stage              | ≥2 vs. 1        | 1.934        | 1.292-2.897 | 0.001   | 1.905           | 1.270-2.858 | 0.002   | 1.774                    | 1.106-2.844 | 0.017   |
| Hexokinase expression | 2 High vs. low  | 1.262        | 1.026-1.553 | 0.028   | 1.658           | 1.109-2.478 | 0.014   | 1.332                    | 1.045-1.697 | 0.021   |

(y)pN, pathological lymph node status (after neoadjuvant therapy, if applicable); (y)pT, pathological tumor status (after neoadjuvant therapy, if applicable); G, grading, L, lymphatic vessel invasion; Pn, perineural invasion; V, venous vessel invasion; vs, versus; 95% CI, 95% confidence interval; -, not applicable.

Table SII. Univariate Cox regression analyses of male patients and patients with Y chromosome loss.

| Characteristic          | Borders         | Male patients |             |         | Y chromosome loss |             |         |
|-------------------------|-----------------|---------------|-------------|---------|-------------------|-------------|---------|
|                         |                 | Hazard ratio  | 95% CI      | P-value | Hazard ratio      | 95% CI      | P-value |
| Age, years              | ≥65 vs. <65     | 1.268         | 1.018-1.580 | 0.034   | 1.271             | 0.930-1.736 | 0.132   |
| Sex                     | Female vs. male | -             | -           | -       | 0.612             | 0.370-1.013 | 0.056   |
| (y)pT                   | ≥ 2 vs. 1       | 1.595         | 1.376-1.848 | <0.001  | 1.760             | 1.418-2.183 | <0.001  |
| (y)pN                   | ≥1 vs. 0        | 1.666         | 1.511-1.836 | <0.001  | 1.719             | 1.498-1.973 | <0.001  |
| L, stage                | 1 vs. 0         | 1.077         | 0.939-1.234 | 0.289   | 1.083             | 0.887-1.322 | 0.435   |
| V, stage                | ≥1 vs. 0        | 0.885         | 0.767-1.022 | 0.096   | 0.946             | 0.774-1.158 | 0.592   |
| Pn, stage               | 1 vs. 0         | 0.989         | 0.863-1.132 | 0.869   | 0.976             | 0.800-1.189 | 0.807   |
| G, stage                | ≥2 vs. 1        | 1.920         | 1.251-2.946 | 0.003   | 2.806             | 1.649-4.774 | <0.001  |
| Hexokinase 2 expression | High vs. low    | 1.262         | 1.012-1.572 | 0.039   | 1.465             | 1.066-2.014 | 0.018   |

(y)pN, pathological lymph node status (after neoadjuvant therapy, if applicable); (y)pT, pathological tumor status (after neoadjuvant therapy, if applicable); G, grading; L, lymphatic vessel invasion; Pn, perineural invasion; V, venous vessel invasion; vs, versus; 95% CI, 95% confidence interval; -, not applicable.

Table SIII. Multivariate Cox regression analyses of male patients and patients with Y chromosome loss.

| Characteristic          | Borders         | Male patients |             |         | Y chromosome loss |             |         |
|-------------------------|-----------------|---------------|-------------|---------|-------------------|-------------|---------|
|                         |                 | Hazard ratio  | 95% CI      | P-value | Hazard ratio      | 95% CI      | P-value |
| Age, years              | ≥65 vs. <65     | 1.318         | 0.786-2.208 | 0.295   | 1.024             | 0.537-1.953 | 0.943   |
| Sex                     | Female vs. male | -             | -           | -       | 0.346             | 0.126-0.950 | 0.040   |
| (y)pT                   | ≥ 2 vs. 1       | 1.903         | 1.351-2.682 | <0.001  | 1.804             | 1.163-2.799 | 0.008   |
| (y)pN                   | ≥1 vs. 0        | 1.517         | 1.191-1.933 | <0.001  | 1.682             | 1.283-2.205 | <0.001  |
| V, stage                | ≥1 vs. 0        | 0.844         | 0.631-1.130 | 0.255   | -                 | -           | -       |
| G, stage                | ≥2 vs. 1        | 1.217         | 0.770-1.923 | 0.400   | 1.696             | 0.915-3.143 | 0.094   |
| Hexokinase 2 expression | High vs. low    | 1.395         | 0.889-2.189 | 0.147   | 1.505             | 0.830-2.727 | 0.178   |

(y)pN, pathological lymph node status (after neoadjuvant therapy, if applicable); (y)pT, pathological tumor status (after neoadjuvant therapy, if applicable); G, grading; V, venous vessel invasion; vs, versus; 95% CI, 95% confidence interval; -, not applicable
